# Supplementary material
Source: Springer Nature journal article supplement (https://www.springermedizin.de/resource/supplementary/13023_2013_597_MOESM3_ESM.pdf/9642494)

**Subject 1**

**a**

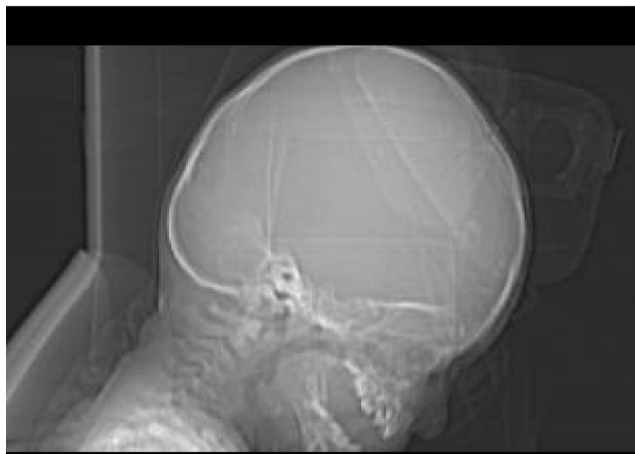

**Subject 2**

**b**

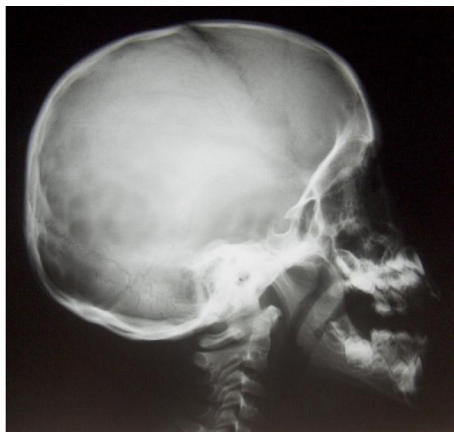

**c**

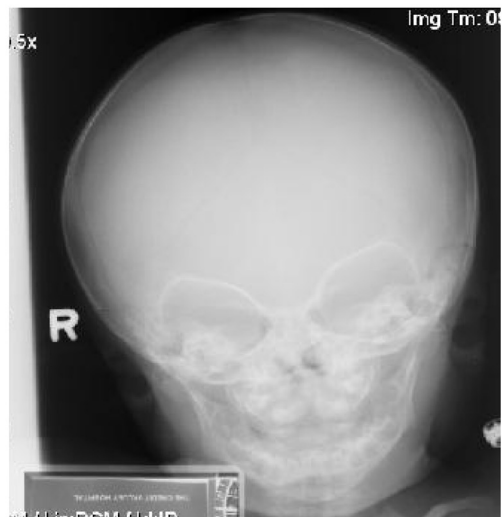

**d**

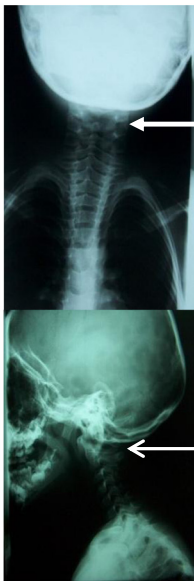

**e**

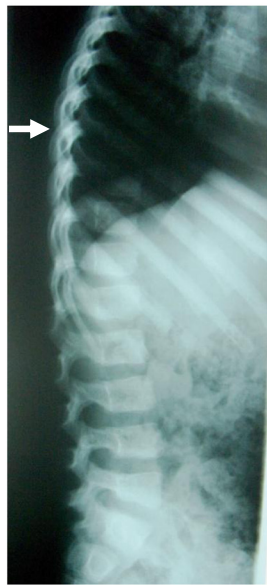

Supplement: MOESM3 [file 9642494]
